# Supplementary material for: Distribution and Diversity of Bacteria and Fungi Colonization in Stone Monuments Analyzed by High-Throughput Sequencing
Source: PubMed Central journal article supplement (PMC5033376; doi:10.1371/journal.pone.0163287), 2016-09-22
Supplement: pone.0163287.s005.pdf [file pone.0163287.s005.pdf]

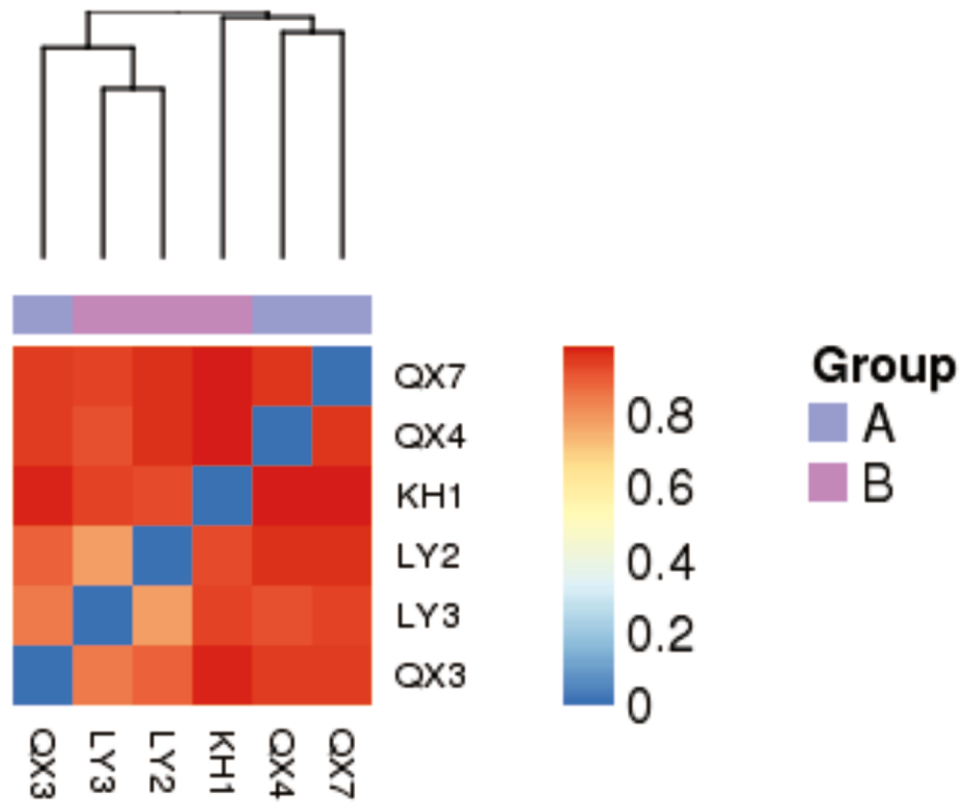

(A)

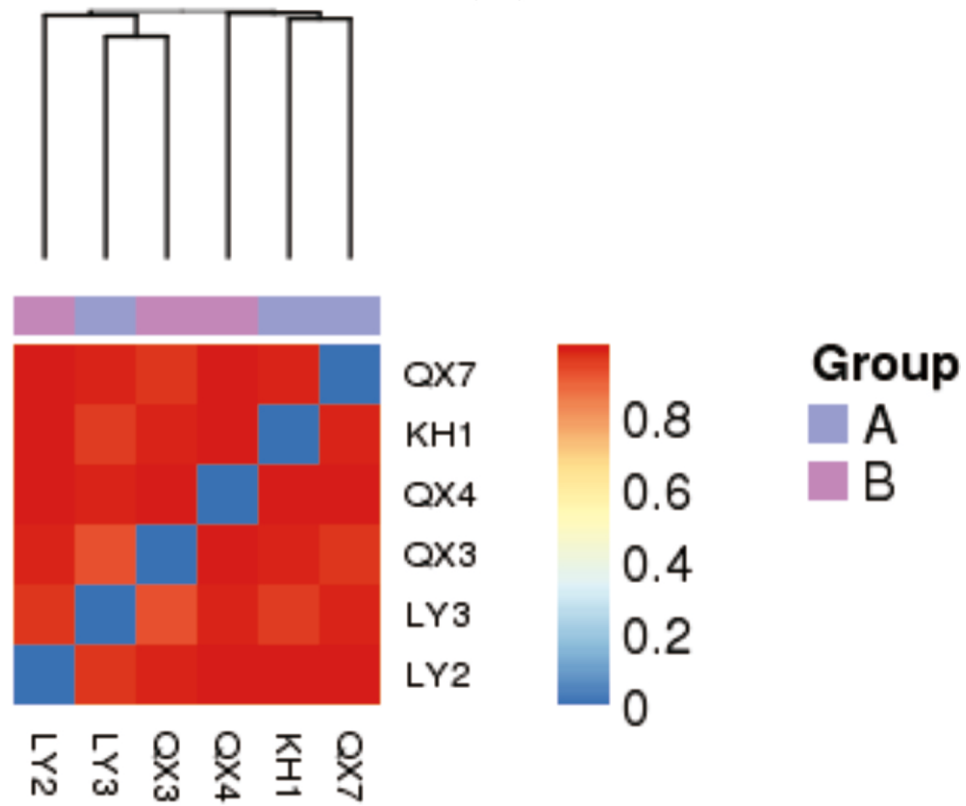

(B)
